# Supplementary material
Source: HighWire-hosted journal article supplement (http://www.qdcxjkg.com/highwire/filestream/113878/field_highwire_adjunct_files/0/ERJ-01367-2012_Disclosure.pdf)
Supplement: ERJ-01367-2012_Disclosure.pdf [file ERJ-01367-2012_Disclosure.pdf]

**L.M. Fabbri** has received payment for consultancy from: Boehringer Ingelheim, Chiesi Farmaceutici, GlaxoSmithKline, Merck Sharp & Dhome, Novartis, Nycomed, Pearl Therapeutics, Sigma-Tau, Sterna, Peer Voice Europe, OM Pharma Sa, TEVA; and payment for lectures, advisory boards or travel expenses and reimbursements from: AstraZeneca, Dey Pharma, Novartis, Schering Plough, Sigma-Tau, Roche, German Aerospace Center, Mundipharma Int., Genetech Inc, Elevation Pharmaceutical, Ferrer Group. In addition his institution has received grants from Boehringer Ingelheim, Schering Plough, Pfizer, Nycomed, Menarini Industrie Farmaceutiche, Chiesi Farmaceutici, GlaxoSmithKline, Merck Sharp & Dhome, Roche, AstraZeneca, Novartis, SigmaTau, the Italian Ministry for University and Research, and the Italian Ministry of Health.
